# Supplementary material for: Afghan Hindu Kush: Where Eurasian Sub-Continent Gene Flows Converge
Source: PLoS One. 2013 Oct 18;8(10):e76748. doi: 10.1371/journal.pone.0076748 (PMC3799995; doi:10.1371/journal.pone.0076748)
Supplement: Figure S5 — Central Asia mt-DNA tree. Hierarchic phylogenetic relationships and frequencies (percentages) of the mitochondrial haplogroups observed in the 516 Afghan samples analyzed in the present study. The mutations are scored relative to the RSRS (2); ! denotes a back mutation to ancestral status. Some of the tips are color coded to reflect the most likely geographical origin (or more prevalent at times), and their overall frequencies reported. WA: West Eurasia, SA: South Asia, EA: East Eurasia. (XLSX) [file pone.0076748.s005.xlsx]

## Sheet: Figure S5
																																					Hazara				Pashtun				Tajik				Turkmen
																																					n=78				n=90				n=146				n=75
																																			WE		29		0.371795		46		0.511111		83		0.568493		40
																																			SA		19		0.24359		25		0.277778		26		0.178082		10
																																			EE		26		0.333333		9		0.1		19		0.130137		15
																									14668			D4			11696			D4j			2		0.025641		1		0.0111111		1		0.00684932		1
																						D															2		0.025641		-		-		4		0.0273973		4
																															16189!			D5'6			-		-		-		-		1		0.00684932		-
																													447G		16270			M2a			-		-		1		0.0111111		-		-		-
																										16126			M3								-		-		-		-		-		-		2
																															4580			M3a			-		-		3		0.0333333		3		0.0205479		-
																									16311!				16145		16261			M4			4		0.0512821		3		0.0333333		-		-		1
																															16289			M65a			-		-		-		-		1		0.00684932		-
																												511			16184			M65b			-		-		-		-		1		0.00684932		-
																															16318T			M18			-		-		-		-		-		-		-
																		12007			M4'67																4		0.0512821		-		-		2		0.0136986		-
																									195A			M30			16166d			M30c1			1		0.0128205		-		-		1		0.00684932		1
						M
																															15259			M30d			1		0.0128205		-		-		1		0.00684932		-
																															10556			M37			-		-		1		0.0111111		-		-		-
																															16184			M66			-		-		-		-		1		0.00684932		-
																															16129!			M5a'd			-		-		1		0.0111111		3		0.0205479		-
																															15908			M33a			1		0.0128205		1		0.0111111		1		0.00684932		-
																																Other M					5		0.0641026		2		0.0222222		5		0.0342466		1
																																					-		-		1		0.0111111		1		0.00684932		2
																												C4			15968			C4a1			7		0.0897436		1		0.0111111		2		0.0136986		-
																				16298			M8								3816			C4b			-		-		1		0.0111111		1		0.00684932		2
																													16185		16260			Z			3		0.0384615		3		0.0333333		-		-		1
																							16362			G			16227		16278!			G2a			4		0.0512821		-		-		3		0.0205479		4
																															16274			G3			1		0.0128205		2		0.0222222		-		-		-
																													16274		16295			N1e			-		-		-		-		1		0.00684932		-
		L3																											16129!		16391			I			-		-		-		-		2		0.0136986		4
																													16301		16356			N1d			-		-		1		0.0111111		-		-		1
																													16201		16265			N1c			-		-		-		-		1		0.00684932		2
																								N1			16145		16176G		16390			N1b			3		0.0384615		2		0.0222222		-		-		-
																																					-		-		-		-		-		-		-
																												W			1406			W3			-		-		-		-		6		0.0410959		2
																															16325			W6			-		-		1		0.0111111		3		0.0205479		-
																													16257A		16261			N9a			2		0.025641		-		-		-		-		1
																															14178			Y1a			-		-		-		-		2		0.0136986		-
																						16290		16319			A				16362			A4			-		-		-		-		1		0.00684932		-
																													16227C		16311!			A10			1		0.0128205		-		-		-		-		-
																						16189!		16278!			X										-		-		1		0.0111111		-		-		-
																													16179		16357			X2j			-		-		1		0.0111111		2		0.0136986		-
																															16071			R2			-		-		4		0.0444444		2		0.0136986		2
																																					-		-		-		-		1		0.00684932		-
						N																					16145		16222		16261			J1b			-		-		3		0.0333333		5		0.0342466		2
																				16069			J								7789			J1d			-		-		-		-		2		0.0136986		-
																															16193			J2b			-		-		-		-		-		-		-
																16126											16163		16186		16189!			T1a			-		-		3		0.0333333		2		0.0136986		1
																																					-		-		1		0.0111111		4		0.0273973		1
																						16294			T			T2			16304			T2b			-		-		-		-		-		-		1
																													13167		15940			R3			-		-		-		-		-		-		1
																													16304		16524			R5			-		-		2		0.0222222		-		-		-
																																					-		-		-		-		-		-		1
																						249d			F1						16172			F1a			4		0.0512821		-		-		-		-		-
																											16232A		16249		16311!			F1b			1		0.0128205		1		0.0111111		2		0.0136986		1
																															16217			B4			-		-		-		-		1		0.00684932		-
																												B			16140			B5			1		0.0128205		-		-		1		0.00684932		-
																													16126		16362			R0a			-		-		4		0.0444444		-		-		-
																																					5		0.0641026		5		0.0555556		8		0.0547945		5
																													72		16298			HV0			-		-		-		-		2		0.0136986		-
								R																					73!		16217			HV2			-		-		-		-		1		0.00684932		1
																													16172		16311!			HV6			-		-		-		-		3		0.0205479		-
																															3010			H1			1		0.0128205		2		0.0222222		3		0.0205479		2
																									1438			H2			4769			H2a			-		-		3		0.0333333		4		0.0273973		-
														HV
																															8598			H2b			-		-		-		-		3		0.0205479		-
																									3992			H4									-		-		1		0.0111111		-		-		-
																															14582			H4a			-		-		-		-		1		0.00684932		-
																							456		16304			H5									1		0.0128205		1		0.0111111		2		0.0136986		-
																															4336			H5a			2		0.025641		4		0.0444444		1		0.00684932		3
																		H					239		16482			H6									-		-		-		-		-		-		-
																															3915			H6a			-		-		2		0.0222222		1		0.00684932		2
																															4793			H7			-		-		1		0.0111111		-		-		1
																															14872			H13			-		-		-		-		3		0.0205479		2
																							10217			H14											-		-		2		0.0222222		-		-		-
																													16256		16352			H14a			2		0.025641		-		-		-		-		-
																													55		57			H15			1		0.0128205		-		-		3		0.0205479		1
																																Other H					4		0.0512821		2		0.0222222		6		0.0410959		6
																															16249			U1			2		0.025641		1		0.0111111		1		0.00684932		1
																							16192		16270			U5			16256			U5a			5		0.0641026		-		-		7		0.0479452		-
																															14182			U5b			-		-		2		0.0222222		3		0.0205479		-
																															16206C			U2a			-		-		2		0.0222222		1		0.00684932		-
																												U2b									1		0.0128205		1		0.0111111		-		-		-
													U
																			16051			U2									16353			U2b2			2		0.025641		5		0.0555556		5		0.0342466		3
																															16234			U2c´d			-		-		2		0.0222222		1		0.00684932		1
																											16129C		16189!		16362			U2e			-		-		1		0.0111111		6		0.0410959		-
																									16343			U3			4188			U3b			-		-		1		0.0111111		1		0.00684932		-
																															8818			U4a			1		0.0128205		1		0.0111111		3		0.0205479		2
																									16356			U4			7735			U4b			-		-		-		-		-		-		2
																															16179			U4c1			-		-		-		-		-		-		-
																															16318T			U7			2		0.025641		4		0.0444444		3		0.0205479		-
																															16234			U8b			-		-		-		-		-		-		-
																																					-		-		-		-		-		-		1
																							16224		16311!			K			497			K1a			2		0.025641		2		0.0222222		4		0.0273973		3
