# Supplementary material for: Afghan Hindu Kush: Where Eurasian Sub-Continent Gene Flows Converge
Source: PLoS One. 2013 Oct 18;8(10):e76748. doi: 10.1371/journal.pone.0076748 (PMC3799995; doi:10.1371/journal.pone.0076748)
Supplement: Figure S7 — Central Asia Y-chromosome tree. Hierarchic phylogenetic relationships and frequencies (percentages), haplogroup and haplotype diversity of the 84 paternal haplogroups observed in the 87 Pachtuns, 142 Tajiks, 77 Hazaras, 74 Turkmens and 127 Uzbeks from Afghanistan. The following additional population samples were analyzed at comparable Y-chromosome resolution: 186 samples from Iran, 150 samples from Kyrgyzstan, 160 samples from Mongolia, plus 176 samples from Pakistan (HGDP-CEPH). M89, M429, M522, P326, M526 (in italics) were not genotyped but were included for phylogenetic context. In addition, M356, M93, V68, V257, M293, V42, V92, M426, M253, M205, M340, M378, V88 and SRY1532.2 were typed in the present study, but no derived alleles were observed. (XLSX) [file pone.0076748.s007.xlsx]

## Sheet: FREQUENCIES
COUNTRY	POPULATIONS	CODES	Total	Haplogroups diversity	YSTR diversity (±sd)		C5-M356		C-M130*		C3a-M386		C3a2-M407		C3-PK2*		C3b2a-M86		C3b-M532		C3b2b-M546		C3b2b1-M401				D1-M15		D3a-P47		D?-M533		E1b1a1g-U175			E1b1b-M215	E1b1b1-M35*		E1b1b1a1c-V22	E1b1b1a1-M78*		E1b1b1a2 V13			E1b1b1b1-M81		E1b1b1c1 M34		F-89*
Pakistan	Balochi	PK1	25	0.87667	0.61321 (±0.19711)		0		0		0		0	0	0	0	0		0		0		0	0		0	0		0	0	0		0			0	0		8	0	0	0	0		0		0		0
	Brahui	PK2	25	0.92333	0.59579 (±0.20346)		4		0		0		0	0	0	0	0		0		0		0	0		0	0		0	0	0		0			0	0		0	0	0	0	0		0		0		0
	Buruscho	PK3	20	0.89474	0.57645 (±0.21849)		0		0		5		0	0	0	0	0		0		0		0	0		0	0		0	0	0		0			0	0		0	0	0	0	0		0		0		0
	Hazara	PK4	25	0.75333	0.54233 (±0.19220)		0		0		4		0	0	0	0	0		0		0		36	0		0	0		0	0	0		0			0	0		0	0	0	0	0		0		0		0
	Kalash	PK5	20	0.85263	0.53961 (±0.23712)		0		0		0		0	0	0	0	0		0		0		0	0		0	0		0	0	0		0			0	0		0	0	0	0	0		0		0		0
	Makrani	PK6	20	0.88421	0.64294 (±0.19586)		0		0		0		0	0	0	0	0		0		0		0	0		0	0		0	0	0		5			0	0		0	0	0	0	0		0		0		0
	Pathan	PK7	20	0.85714	0.57464 (±0.21622)		0		0		0		0	0	0	0	0		0		0		5	0		0	0		0	0	0		0			0	0		0	0	0	0	0		0		0		0
	Sindhi	PK8	21	0.70476	0.59459 (±0.19539)		0		0		0		0	0	0	0	0		0		0		0	0		0	0		0	0	0		0			0	0		0	0	0	0	0		0		0		0
	Pakistan		176	0.91230			0.568182		0		1.13636		0	0	0	0	0		0		0		6.25	0		0	0		0	0	0		0.568182			0	0		1.13636	0	0	0	0		0		0		0
Iran	East Azeri	IR1	21	0.95714	0.63434 (±0.19856)		0		0		0		0	0	0	0	0		0		4.7619		0	0		0	0		0	0	0		0			0	0		0	0	0	9.52381	0		0		0		0
	Esfahan	IR2	42	0.96283	0.62173 (±0.19170)		0		0		0		0	0	0	0	0		0		0		0	0		0	0		0	0	0		0			0	0		2.38095	0	0	0	0		0		2.38095		0
	Gilan	IR3	27	0.95442	0.63275 (±0.19410)		0		0		0		0	0	0	0	0		0		0		0	0		0	0		0	0	0		0			0	0		0	0	0	0	0		0		11.1111		0
	Khorasan	IR4	20	0.94211	0.62776 (±0.21153)		0		0		0		0	0	0	0	0		0		0		0	0		0	0		0	0	0		0			5	0		5	0	0	5	0		0		5		0
	Kordestan	IR5	25	0.97667	0.65378 (±0.17697)		0		0		0		0	0	0	0	0		0		0		0	0		0	0		0	0	0		0			0	0		4	4	0	0	0		0		8		0
	Mazandaran	IR6	13	0.94872	0.63090 (±0.21233)		0		0		0		0	0	0	0	0		0		0		0	0		0	0		0	0	0		0			0	0		0	0	0	0	0		0		0		0
	South Iran	IR7	9		0.66207 (±0.20997)		0		0		0		0	0	0	0	0		0		0		0	0		0	0		0	0	0		0			0	0		0	0	0	0	0		0		0		0
	Teheran	IR8	18	0.95425	0.61829 (±0.22660)		0		0		0		0	0	0	0	0		0		0		0	0		0	0		0	0	0		0			0	0		5.55556	0	0	0	0		0		0		0
	Unknown	IR9	11	0.90909	0.62222 (±0.21742)		0		0		0		0	0	0	0	0		0		0		0	0		0	0		0	0	0		0			0	0		18.1818	0	0	0	0		0		0		9.09091
	Iranian		186	0.95897			0		0.537634		0		0	0	0	0	0		0		0		0	0		0	0		0	0	0		0			0.537634	0		3.22581	0.537634	0	1.6129	0		0		3.76344		0.537634
Afghanistan	Hazara-Balkh	AZ1	8		0.62406 (±0.22092)		0		0		0		0	0	0	0	0		12.5		0		37.5	0		0	0		0	0	0		0			0	0		0	0	0	0	0		0		0		0
	Hazara-Bamiyan	AZ6	69	0.88789	0.57026 (±0.23003)		0		1.44928		5.7971		0	0	0	0	0		1.44928		0		26.087	0		0	0		0	0	0		0			0	0		0	0	0	0	0		0		10.1449		0
	Hazara		77	0.88927			0		1.2987		5.19481		0	0	0	0	0		2.5974		0		27.2727	0		0	0		0	0	0		0			0	0		0	0	0	0	0		0		9.09091		0
	Pashtun-Baghlan	PT2	34	0.63993	0.50580 (±0.19997)		0		0		0		0	0	0	0	0		0		0		0	0		0	0		0	0	0		0			0	0		0	0	0	0	0		0		0		0
	Pashtun-Kunduz	PT4	53	0.69013	0.53266 (±0.20538)		0		1.88679		0		0	0	0	0	0		0		0		0	0		0	0		0	0	0		0			0	0		0	0	0	0	0		0		0		0
	Pashtun		87	0.67041			0		1.14943		0		0	0	0	0	0		0		0		0	0		0	0		0	0	0		0			0	0		0	0	0	0	0		0		0		0
	Tajik-Badakhshan	TJ5	37	0.94595	0.63849 (±0.18347)		0		0		16.2162		0	0	0	0	0		2.7027		0		0	0		0	0		0	0	0		0			0	0		0	0	0	0	0		0		0		0
	Tajik-Balkh	TJ1	54	0.82600	0.60579 (±0.18741)		0		0		1.85185		0	0	0	0	0		0		0		1.85185	0		0	0		0	0	0		0			0	0		0	0	0	3.7037	0		0		0		0
	Tajik-Samangan	TJ10	16	0.93333	0.62199 (±0.20391)		0		0		0		0	0	0	0	0		6.25		0		0	0		0	0		0	0	0		0			0	0		0	0	0	0	0		0		0		0
	Tajik-Takhar	TJ7	35	0.91765	0.63191 (±0.18940)		0		0		0		0	0	0	0	0		2.85714		0		5.71429	0		0	0		0	0	0		0			0	0		0	0	0	0	0		0		0		0
	Tajik		142	0.90770			0		0		4.92958		0	0	0	0	0		2.11268		0		2.11268	0		0	0		0	0	0		0			0	0		0	0	0	1.40845	0		0		0		0
	Turkmen-Jawzjan		74	0.86857			0		0		0		0	0	0	0	0		0		0		1.35135	0		0	0		0	0	0		0			0	1.35135		0	0	0	2.7027	0		0		1.35135		0
	Uzbek-Balkh	UZ1	5				0		0		0		0	0	0	0	0		0		0		0	0		0	0		0	0	0		0			0	0		0	0	0	0	0		0		0		0
	Uzbek-Jawzjan	UZ8	94	0.89568	0.62763 (±0.19195)		0		0		0		0	0	0	0	0		0		0		1.06383	0		0	0		0	0	0		0			0	0		0	0	0	0	0		0		2.12766		0
	Uzbek-Sar-e-Pol	UZ3	28	0.90476	0.62042 (±0.19302)		0		0		0		0	0	0	0	0		3.57143		0		10.7143	0		0	0		0	0	0		0			0	0		0	0	0	0	0		0		0		0
	Uzbek		127	0.90089			0		0		0		0	0	0	0	0		0.787402		0		3.14961	0		0	0		0	0	0		0			0	0		0	0	0	0	0		0		1.5748		0
Kyrgyzstan	Dungan	DG	12	0.96970	0.63014 (±0.21438)		0		0		16.6667		0	0	0	0	0		0		0		8.33333	0		0	8.33333		0	0	0		0			0	0		0	0	0	0	0		0		0		0
	Uyghur		6		0.62807 (±0.21351)		0		0		0		0	0	0	0	0		0		0		0	0		0	0		0	0	0		0			0	0		0	0	0	0	0		0		0		0
	Kyrgz-SouthWest	KG4	20	0.75789	0.53642 (±0.22109)		0		0		0		0	0	0	0	5		0		0		25	0		0	0		0	0	0		0			0	0		0	0	0	0	0		5		0		0
	Kyrgz-Central	KG2	40	0.77949	0.56517 (±0.19556)		0		0		2.5		0	0	0	0	7.5		7.5		0		10	0		0	0		0	0	0		0			0	0		0	0	0	0	0		0		0		0
	Kyrgz-NorthWest	KG3	37	0.64114	0.53764 (±0.18272)		0		0		0		0	0	0	0	0		10.8108		0		0	0		0	0		0	0	0		0			0	0		0	0	0	0	0		0		0		0
	Kyrgz-East	KG1	35	0.56639	0.43562 (±0.16982)		0		0		0		0	0	0	0	8.57143		0		0		5.71429	0		0	0		0	0	0		0			0	0		0	0	0	0	0		0		0		0
	Kyrgz		132	0.69015			0		0		0.757576		0	0	0	0	5.30303		5.30303		0		8.33333	0		0	0		0	0	0		0			0	0		0	0	0	0	0		0.757576		0		0
Mongolia	Mongol-Central	MG1	18	0.92810	0.60173 (±0.19547)		0		0		0		5.55556	0	0	0	22.2222		16.6667		0		5.55556	0		0	0		0	0	11.1111		0			0	0		0	0	0	0	0		0		0		0
	Mongol-NorthEast	MG2	20	0.92105	0.58600 (±0.22612)		0		0		0		10	0	0	0	15		5		0		15	0		0	0		0	0	5		0			0	0		0	0	0	0	0		0		0		0
	Mongol-NorthWest	MG3	97	0.87715	0.59071 (±0.16875)		0		0		3.09278		6.18557	0	0	0	29.8969		2.06186		0		11.3402	0		0	0		1.03093	0	0		0			0	0		0	0	0	0	0		0		0		0
	Mongol-SouthEast	MG4	23	0.92885	0.56626 (±0.19825)		0		0		0		8.69565	0	0	0	4.34783		4.34783		4.34783		26.087	0		0	0		0	0	8.69565		0			0	0		0	0	0	0	0		0		0		0
	Mongol-SouthWest	MG5	2				0		0		0		50	0	0	0	0		50		0		0	0		0	0		0	0	0		0			0	0		0	0	0	0	0		0		0		0
	Mongol		160	0.90802			0		0		1.875		7.5	0	0	0	23.125		5		0.625		13.125	0		0	0		0.625	0	3.125		0			0	0		0	0	0	0	0		0		0		0
[truncated: 120 more columns]

## Sheet: NUMBER
COUNTRY	POPULATIONS	CODES	Total	Haplogroups diversity	YSTR diversity (±sd)		C5-M356		C-M130*		C3a-M386		C3a2-M407		C3-PK2*		C3b2a-M86		C3b-M532		C3b2b-M546		C3b2b1-M401				D1-M15		D3a-P47		D?-M533		E1b1a1g-U175			E1b1b-M215	E1b1b1-M35*		E1b1b1a1c-V22	E1b1b1a1-M78*		E1b1b1a2 V13			E1b1b1b1-M81		E1b1b1c1 M34		F-89*
Pakistan	Balochi	PK1	25	0.87667	0.61321 (±0.19711)																																		2
	Brahui	PK2	25	0.92333	0.59579 (±0.20346)		1
	Buruscho	PK3	20	0.89474	0.57645 (±0.21849)						1
	Hazara	PK4	25	0.75333	0.54233 (±0.19220)						1												9
	Kalash	PK5	20	0.85263	0.53961 (±0.23712)
	Makrani	PK6	20	0.88421	0.64294 (±0.19586)																												1
	Pathan	PK7	20	0.85714	0.57464 (±0.21622)																		1
	Sindhi	PK8	21	0.70476	0.59459 (±0.19539)
	Pakistani		176	0.91230			1				2												11										1						2
Iran	East Azeri	IR1	21	0.95714	0.63434 (±0.19856)																1																					2
	Esfahan	IR2	42	0.96283	0.62173 (±0.19170)																																		1								1
	Gilan	IR3	27	0.95442	0.63275 (±0.19410)																																										3
	Khorasan	IR4	20	0.94211	0.62776 (±0.21153)																															1			1			1					1
	Kordestan	IR5	25	0.97667	0.65378 (±0.17697)																																		1	1							2
	Mazandaran	IR6	13	0.94872	0.63090 (±0.21233)
	South Iran	IR7	9		0.66207 (±0.20997)
	Teheran	IR8	18	0.95425	0.61829 (±0.22660)																																		1
	Unknown	IR9	11	0.90909	0.62222 (±0.21742)																																		2										1
	Iranian		186	0.95897					1																											1			6	1		3					7		1
Afghanistan	Hazara-Balkh	AZ1	8		0.62406 (±0.22092)														1				3
	Hazara-Bamiyan	AZ6	69	0.88789	0.57026 (±0.23003)				1		4								1				18																								7
	Hazara		77	0.88927					1		4								2				21																								7
	Pashtun-Baghlan	PT2	34	0.63993	0.50580 (±0.19997)
	Pashtun-Kunduz	PT4	53	0.69013	0.53266 (±0.20538)				1
	Pashtun		87	0.67041					1
	Tajik-Badakhshan	TJ5	37	0.94595	0.63849 (±0.18347)						6								1
	Tajik-Balkh	TJ1	54	0.82600	0.60579 (±0.18741)						1												1																			2
	Tajik-Samangan	TJ10	16	0.93333	0.62199 (±0.20391)														1
	Tajik-Takhar	TJ7	35	0.91765	0.63191 (±0.18940)														1				2
	Tajik		142	0.90770							7								3				3																			2
	Turkmen-Jawzjan		74	0.86857																			1														1					2					1
	Uzbek-Balkh	UZ1	5
	Uzbek-Jawzjan	UZ8	94	0.89568	0.62763 (±0.19195)																		1																								2
	Uzbek-Sar-e-Pol	UZ3	28	0.90476	0.62042 (±0.19302)														1				3
	Uzbek		127	0.90089															1				4																								2
Kyrgyzstan	Dungan	DG	12	0.96970	0.63014 (±0.21438)						2												1				1
	Uyghur		6		0.62807 (±0.21351)
	Kyrgyz-SouthWest	KG4	20	0.75789	0.53642 (±0.22109)												1						5																						1
	Kyrgyz-Central	KG2	40	0.77949	0.56517 (±0.19556)						1						3		3				4
	Kyrgyz-NorthWest	KG3	37	0.64114	0.53764 (±0.18272)														4
	Kyrgyz-East	KG1	35	0.56639	0.43562 (±0.16982)												3						2
	Kyrgyz		132	0.69015							1						7		7				11																						1
Mongolia	Mongol-Central	MG1	18	0.92810	0.60173 (±0.19547)								1				4		3				1								2
	Mongol-NorthEast	MG2	20	0.92105	0.58600 (±0.22612)								2				3		1				3								1
	Mongol-NorthWest	MG3	97	0.87715	0.59071 (±0.16875)						3		6				29		2				11						1
	Mongol-SouthEast	MG4	23	0.92885	0.56626 (±0.19825)								2				1		1		1		6								2
	Mongol-SouthWest	MG5	2										1						1
	Mongol		160	0.90802							3		12				37		8		1		21						1		5
[truncated: 63 more columns]
