# Supplementary material for: Afghan Hindu Kush: Where Eurasian Sub-Continent Gene Flows Converge
Source: PLoS One. 2013 Oct 18;8(10):e76748. doi: 10.1371/journal.pone.0076748 (PMC3799995; doi:10.1371/journal.pone.0076748)
Supplement: Table S2 — List of the samples used for the autosomal analyses: Groups of population, Number of individuals (n), Country/Region of the population and Reference (source). (XLS) [file pone.0076748.s012.xls]

## Sheet: Sheet1
Group_Population	n	Country/Region	source
Hazara	5	Afghanisthan	[8]
Pashtun	5	Afghanisthan	[8]
Tadjik	5	Afghanisthan	[8]
Turkmen	4	Afghanisthan	[8]
Uzbek	5	Afghanisthan	[8]
Mozabites	27	Algeria	[2]
Armenians	19	Armenia	[1]
Armenians	16	Armenia	[3]
Azerbaijani Jews	8	Azerbaijan	[1]
Ashkenazy Jews	3	Austria	[1]
Ashkenazy Jews	2	Belorussia	[1]
Belorussians	10	Belorussia	[1]
Bulgarians	13	Bulgaria	[3]
Sephardic Jews	8	Bulgaria	[1]
Cambodians	10	Cambodia	[2]
Abhkasians	20	Caucasus	[3]
Adygei	17	Caucasus	[2]
Balkars	20	Caucasus	[3]
Chechens	20	Caucasus	[3]
Georgians	20	Caucasus	[1]
Lezgins	18	Caucasus	[1]
Biaka Pygmies	22	Central African Republic	[2]
Dai	10	China	[2]
Daur	9	China	[2]
Han	44	China	[2]
Hezhen	9	China	[2]
Lahu	8	China	[2]
Miaozu	10	China	[2]
Mongola	10	China	[2]
Naxi	8	China	[2]
Oroqens	9	China	[2]
She	10	China	[2]
Tu	10	China	[2]
Tujia	10	China	[2]
Uygurs	10	China	[2]
Xibo	9	China	[2]
Yizu	10	China	[2]
Mbuti Pygmies	13	Democratic Republic of Congo	[2]
Ashkenazy Jews	1	France	[1]
French	28	France	[2]
Georgian Jews	4	Georgia	[1]
Ashkenazy Jews	2	Germany	[1]
Chenchus	4	India	[4]
Gond	4	India	[4]
Gujaratis	88	India	[7]
Halakipikki	4	India	[4]
Kurumba	4	India	[4]
Malayan	2	India	[1]
North Kannadi	9	India	[1]
Paniya	4	India	[1]
Pulliyar	5	India	[4]
Sakilli	4	India	[1]
Velmas	10	India	[4]
Iranian Jews	4	Iran	[1]
Iranians	20	Iran	[1]
Iraqi Jews	11	Iraq	[1]
Bedouins	45	Israel	[2]
Druze	42	Israel	[2]
Palestinians	46	Israel	[2]
North Italians	12	Italy	[2]
Sardinians	28	Italy	[2]
Tuscans	7	Italy	[2]
Japanese	28	Japan	[2]
Jordanians	20	Jordania	[1]
Kazakhs	16	Kazakhstan	[3]
Kurds	6	Kazakhstan	[3]
Bantus	11	Kenya	[2]
Kyrgyz	13	Kyrgyzstan	[3]
Ashkenazy Jews	2	Latvia	[1]
Lebanese	8	Lebanon	[1]
Ashkenazy Jews	1	Lithuania	[1]
Mongolians	9	Mongolia	[1]
Burmese	15	Myanmar	[6]
San	5	Namibia	[2]
Ashkenazy Jews	3	Netherlands	[1]
Yorubas	21	Nigeria	[2]
Balochi	24	Pakistan	[2]
Brahui	25	Pakistan	[2]
Burusho	25	Pakistan	[2]
Hazara	22	Pakistan	[2]
Kalash	23	Pakistan	[2]
Makrani	25	Pakistan	[2]
Pathan	22	Pakistan	[2]
Sindhi	24	Pakistan	[2]
Ashkenazy Jews	3	Poland	[1]
Ashkenazy Jews	3	Romania	[1]
Altaians	13	Russia	[5]
Ashkenazy Jews	1	Russia	[1]
Buryats	19	Russia	[5]
Chuvashs	17	Russia	[1]
Dolgans	7	Russia	[5]
Evenkis	16	Russia	[5]
Kumyks	13	Russia	[3]
Nogais	16	Russia	[3]
North Ossetians	15	Russia	[3]
Russians	25	Russia	[2]
Tuvinians	18	Russia	[5]
Yakuts	25	Russia	[2]
Mandenkas	22	Senegal	[2]
Bantus	8	South Africa	[2]
Sephardic Jews	1	Spain	[1]
Syrians	16	Syria	[1]
Tajik	15	Tajikstan	[3]
Sephardic Jews	10	Turkey	[1]
Turks	19	Turkey	[1]
Turkmen	15	Turkmenistan	[3]
Uzbekistani Jews	2	Uzbekstan	[1]
Uzbek	15	Uzbekstan	[1]
1. Behar, D, M, Yunusbayev, B, et al. (2010) The genome-wide structure of the Jewish people. Nature 466: 238-242.
2. Li, J, Z, Absher, D, et al. (2008) Worldwide human relationships inferred from genome-wide patterns of variation. Science 319: 1100-1104.
3. Yunusbayev, B, Metspalu, M, Jarve, et al. (2012) The Caucasus as an asymmetric semipermeable barrier to ancient human migrations. Mol Biol Evol 29: 359-365.
4. Metspalu, M, Romero, I, G, et al. (2011) Shared and unique components of human population structure and genome-wide signals of positive selection in South Asia. Am J Hum Genet 89: 731-744.
5. Rasmussen, M, Li, Y, Lindgreen, et al. (2010) Ancient human genome sequence of an extinct Palaeo-Eskimo. Nature 463: 757-762.
6. Chaubey, G, Metspalu, M, Choi, et al. (2011) Population genetic structure in Indian Austroasiatic speakers: the role of landscape barriers and sex-specific admixture. Mol Biol Evol 28: 1013-1024.
7. Altshuler, D, M, Gibbs, R, et al. (2010) Integrating common and rare genetic variation in diverse human populations. Nature 467: 52-58.
8. This study
